# Supplementary material for: Bis-anthracene derived bis-pyridine: selective fluorescence sensing of Al3+ ions
Source: Royal Society of Chemistry journal article supplement (doi:10.1039/c8nj04789h), 2018-12-20
Supplement: c8nj04789h1.pdf [file c8nj04789h1.pdf]

## Bis-anthracene derived bis-pyridine: selective fluorescent sensing of Al<sup>3+</sup> ion

N. Bhuvanesh<sup>a</sup>, S. Suresh<sup>a</sup>, K. Kannan<sup>b</sup>, V. Rajesh Kannan<sup>b,\*</sup>, Nikhil Maroli<sup>c</sup>,  
Ponmalai Kolandaivel<sup>d,\*</sup> and R. Nandhakumar<sup>a,\*</sup>

<sup>a</sup>Department of Chemistry, Karunya Institute of Technology and Sciences  
(Deemed-to-be University), Karunya Nagar, Coimbatore - 641 114, India.

E-mail: [nandhakumar@karunya.edu](mailto:nandhakumar@karunya.edu)

<sup>b</sup>Department of Microbiology, Bharathidasan University, Tiruchirappalli – 620 024, India

E-mail: [uvrajesh@gmail.com](mailto:uvrajesh@gmail.com)

<sup>c</sup>Computational biology division, DRDO BU Centre for Life sciences,  
Bharathiar University Campus, Coimbatore-641 046, India

<sup>d</sup>Ponmalai Kolandaivel, Periyar University, Salem- 636 011, India

E-mail: [ponkvel@hotmail.com](mailto:ponkvel@hotmail.com)

Page No.

|                                                                                                                                                            |    |
|------------------------------------------------------------------------------------------------------------------------------------------------------------|----|
| 1. <sup>1</sup> H NMR spectrum of <b>2</b> -----                                                                                                           | S2 |
| 2. <sup>1</sup> H NMR spectrum of receptor <b>APC</b> -----                                                                                                | S2 |
| 3. <sup>13</sup> C-NMR spectrum of receptor <b>APC</b> -----                                                                                               | S3 |
| 4. Mass Spectrum (ESI-MS) of receptor <b>APC</b> -----                                                                                                     | S3 |
| 5. UV-Visible absorption spectrum of receptor <b>APC</b> -----                                                                                             | S4 |
| 6. Effect of pH studies of receptor <b>APC</b> and receptor <b>APC+Al<sup>3+</sup> ion</b> -----                                                           | S4 |
| 7. Fluorescence spectra at different pH of (a) Receptor <b>APC</b> ,<br>(b) Receptor <b>APC-Al<sup>3+</sup> ion</b> . (c) Merge image of (a) and (b) ----- | S5 |
| 7. Effect of time response of receptor <b>APC+Al<sup>3+</sup> ion</b> -----                                                                                | S5 |
| 8. Mass Spectrum (ESI-MS) of receptor <b>APC+Al<sup>3+</sup> ion</b> -----                                                                                 | S6 |
| 9. Particle size distribution of a) Receptor <b>APC</b> b) Receptor <b>APC+Al<sup>3+</sup> ion</b> -----                                                   | S6 |
| 10. Cell viability graph of receptor <b>APC</b> using <i>E. Coli</i> cells by MTT assay -----                                                              | S7 |
| 11. Comparison of LOD with other reported sensors available in the literature-----                                                                         | S7 |

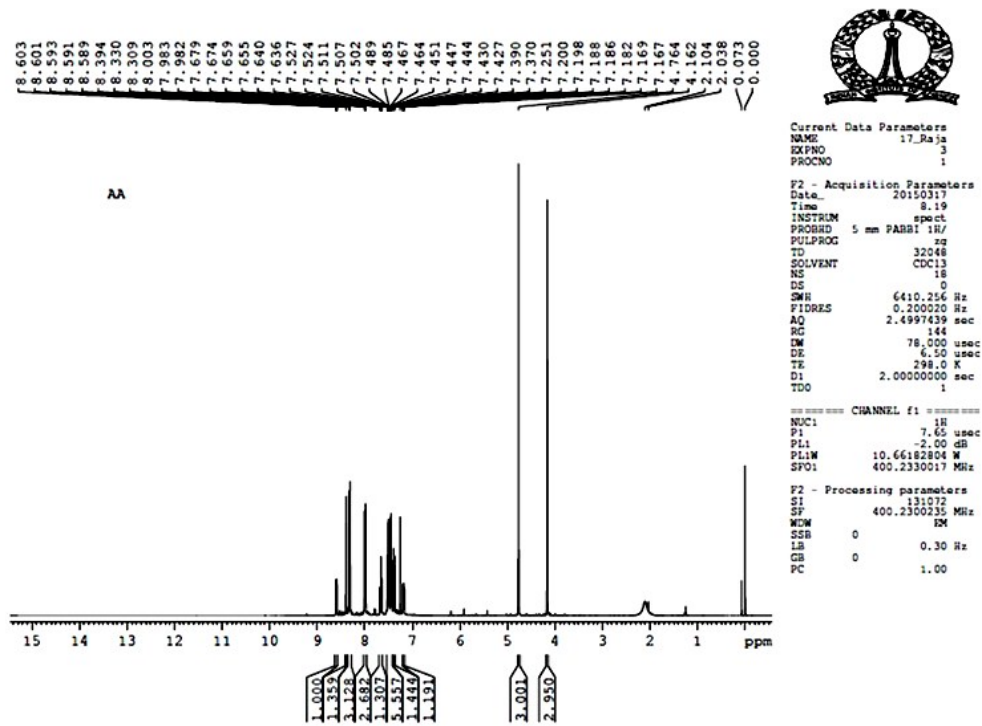

Fig. S1. <sup>1</sup>H NMR Spectrum of 2

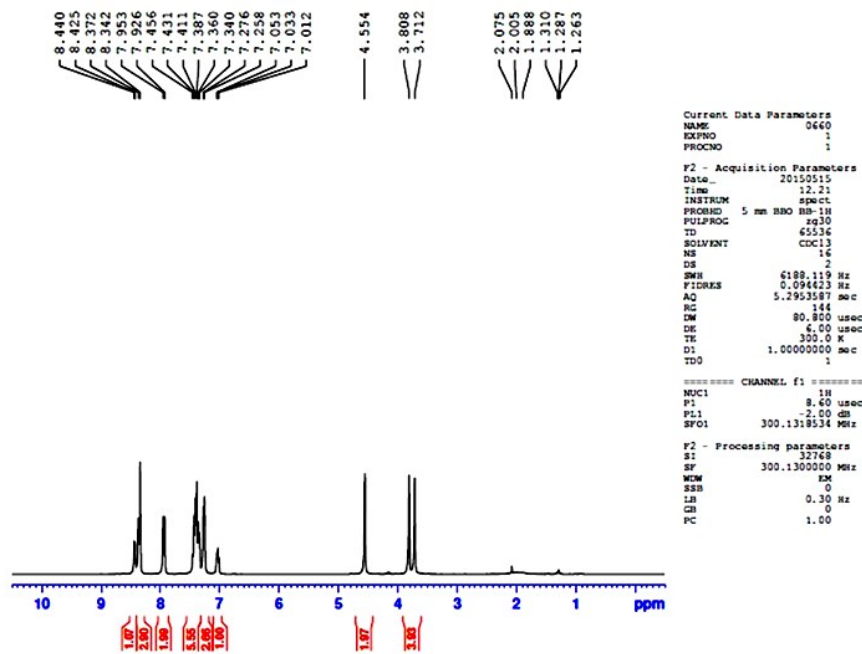

Fig. S2. <sup>1</sup>H NMR Spectrum of receptor APC

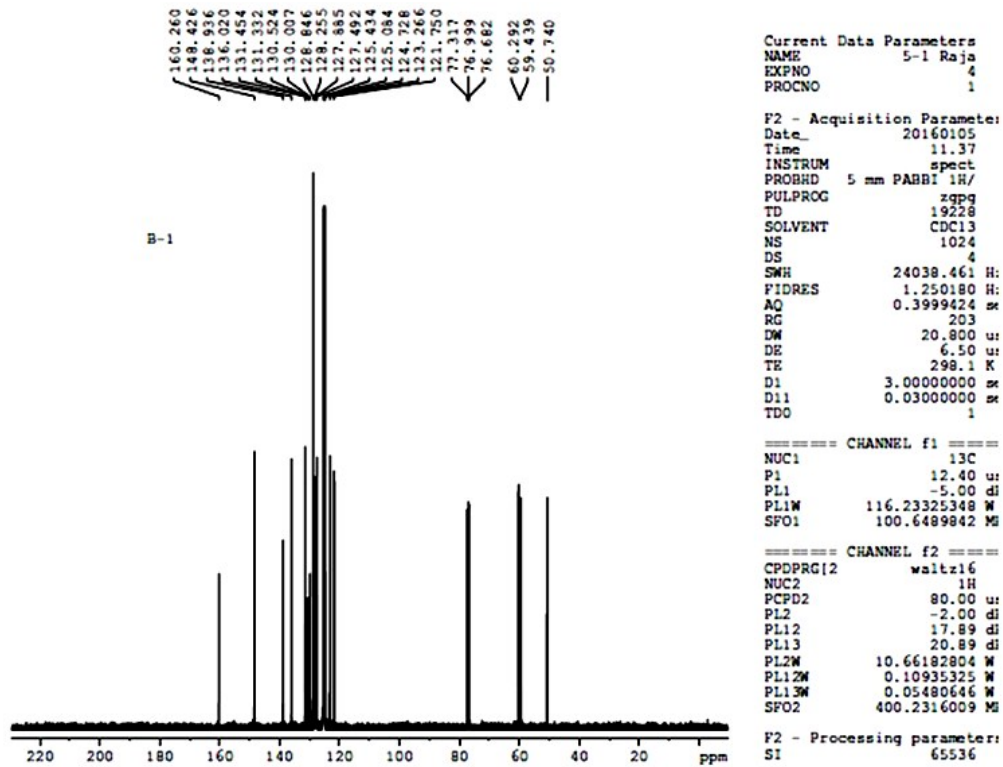

Fig. S3. <sup>13</sup>C NMR Spectrum of receptor APC

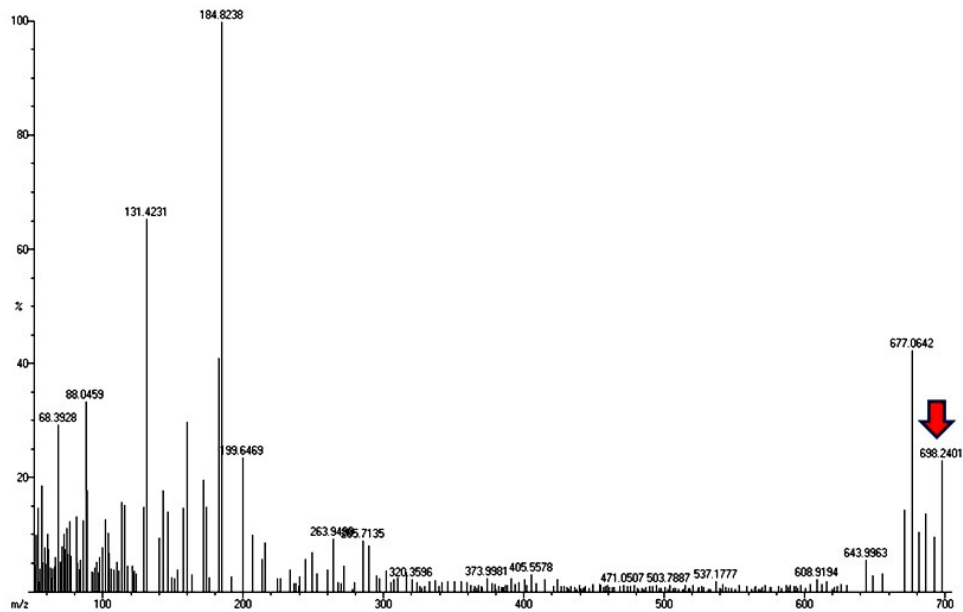

Fig. S4. Mass Spectrum of receptor APC

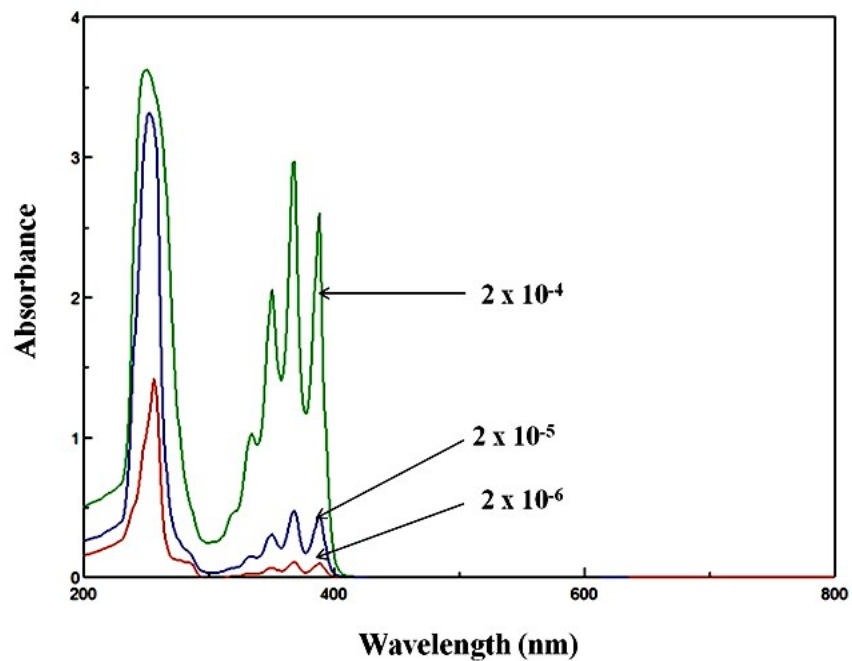

Fig. S5. UV-visible absorption changes of receptor APC in THF-H<sub>2</sub>O solution (1:1 v/v, HEPES=50 mM, pH=7.4)

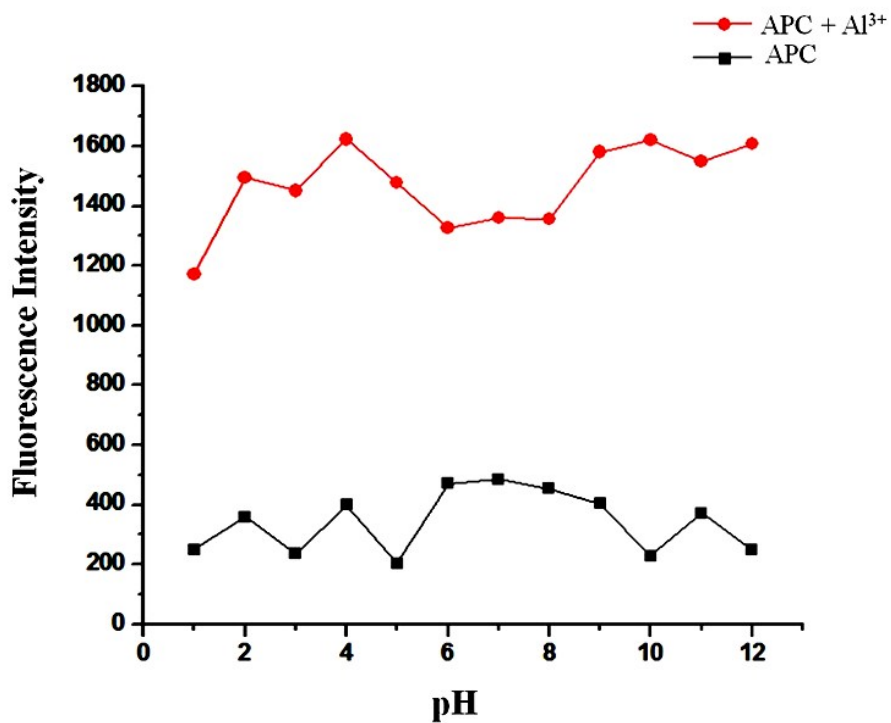

Fig. S6. The effect of pH of receptor APC and receptor APC+Al<sup>3+</sup> in THF-H<sub>2</sub>O solution

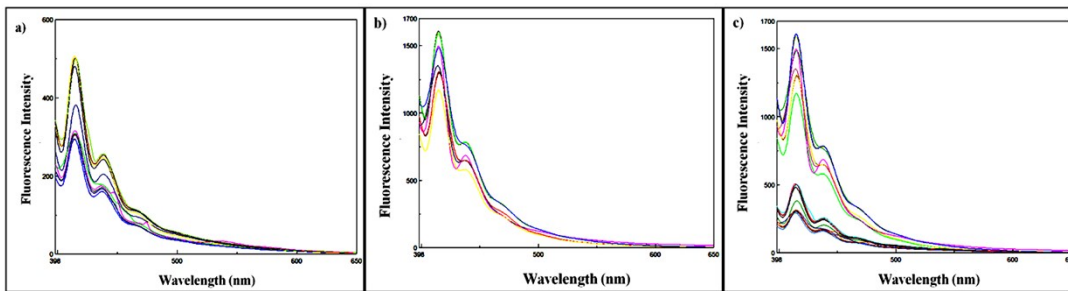

**Fig. S7. Fluorescence spectra at different pH of (a) Receptor APC, (b) Receptor APC-Al<sup>3+</sup>.  
(c) Merge image of (a) and (b).**

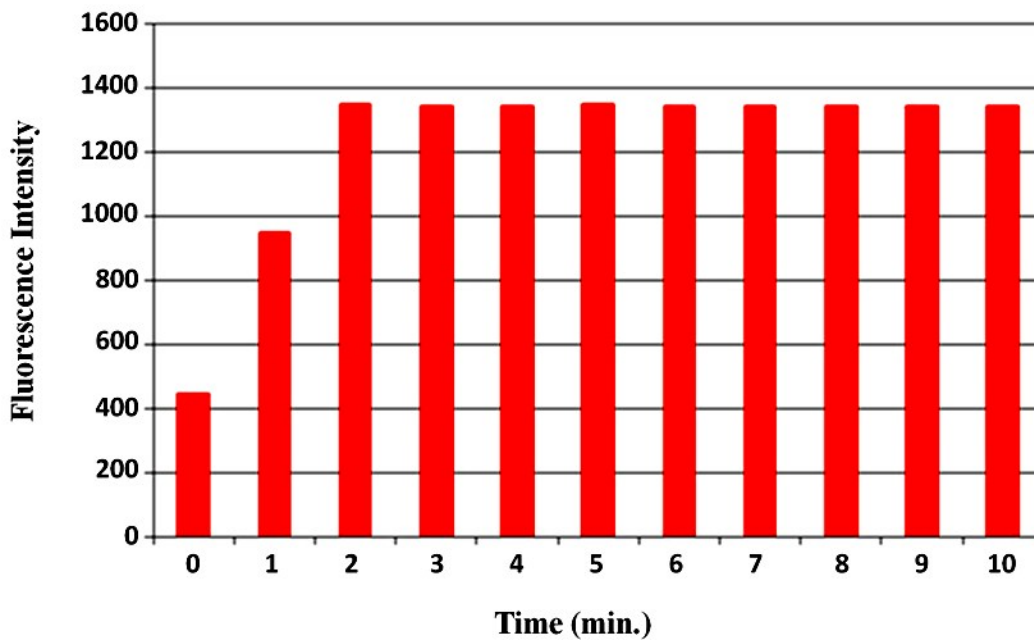

**Fig. S8. The effective time response of receptor APC and receptor APC+Al<sup>3+</sup> in THF-H<sub>2</sub>O solution (1:1 v/v, HEPES= 50 mM, pH=7.4)**

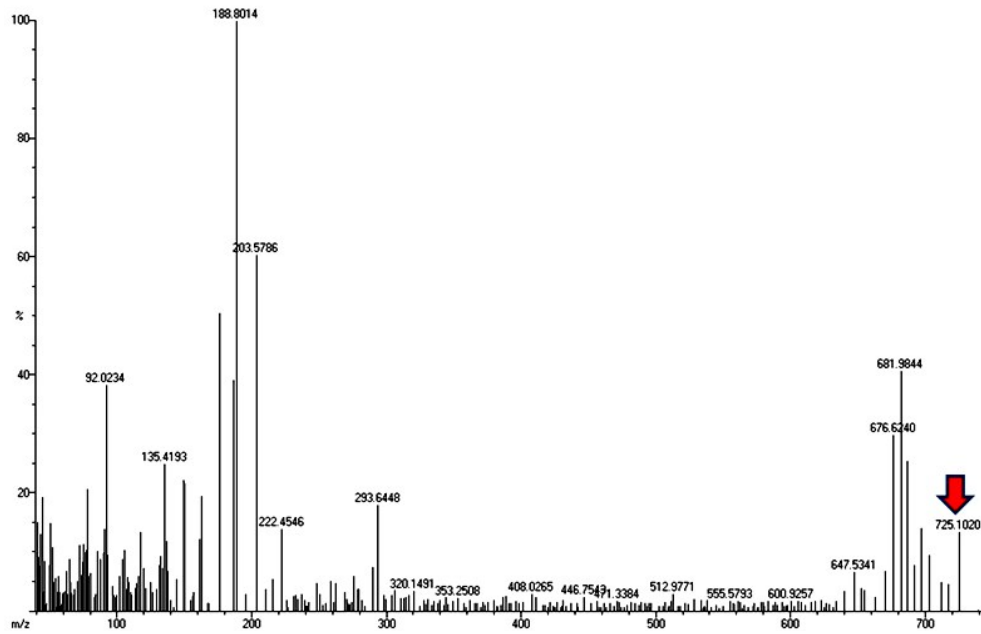

**Fig. S9. Mass Spectrum of receptor APC+Al<sup>3+</sup>**

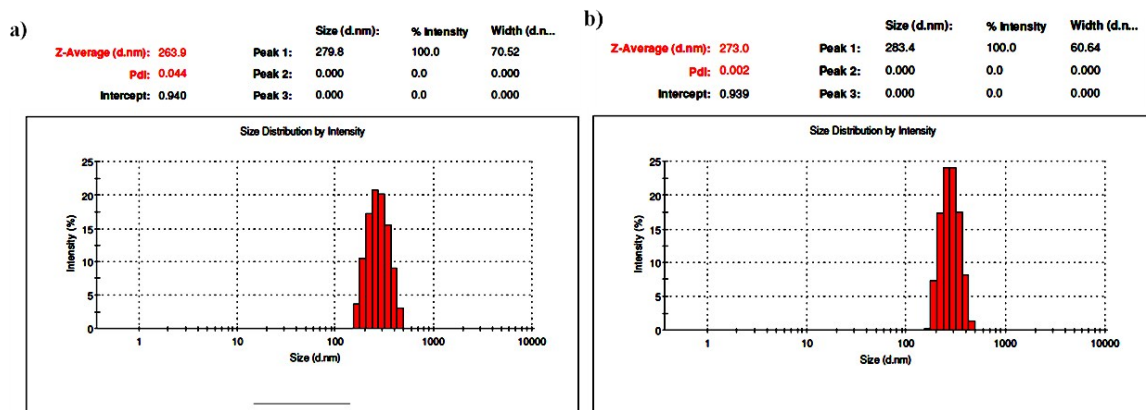

**Fig. S10. Particle size distribution of a) Receptor APC b) Receptor APC+Al<sup>3+</sup>.**

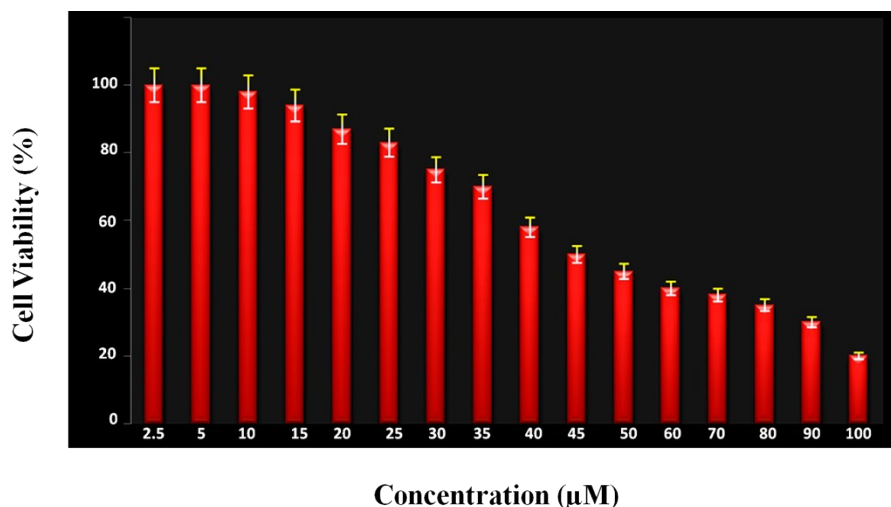

**Fig. S11.** Cell viability graph of receptor APC using *E. Coli* cells by MTT assay.

**Table S1.** Comparison of LOD with other reported sensors available in the literature

| Refs            | Detected Elements | LOD                     | Methods of Detections |
|-----------------|-------------------|-------------------------|-----------------------|
| [1]             | Al <sup>3+</sup>  | $0.99 \times 10^{-6}$ M | Fluorescence          |
| [2]             | Al <sup>3+</sup>  | $2 \times 10^{-6}$ M    | Fluorescence          |
| [3]             | Al <sup>3+</sup>  | $3.60 \times 10^{-6}$ M | Fluorescence          |
| [4]             | Al <sup>3+</sup>  | $0.05 \times 10^{-6}$ M | Fluorescence          |
| This work (APC) | Al <sup>3+</sup>  | $0.89 \times 10^{-6}$ M | Fluorescence          |

## References

- [1] K. Velmurugan, S. Mathankumar, S. Santoshkumar, S. Amudha, R. Nandhakumar, *Spectrochim. Acta Part A.*, 2015, **139**, 119–123.
- [2] J.Q. Wang, L. Huang, L. Gao, J.H. Zhu, Y. Wang, X. Fan and Z. Zou, *Inorg. Chem. Commun.*, 2008, **11**, 203–206.
- [3] C. Gao, P. Zang, W. Liu and Y. Tang, *J. Fluoresc.*, 2016, **26**, 2015–2021.
- [4] B. Liu, P.F. Wang, J. Chai, X. Hu, T. Gao, J. Chao, T. Chen and B. Yang, *Spectrochim. Acta Part A.*, 2016, **168**, 98–103.
